# Supplementary material
Source: PubMed Central journal article supplement (PMC2824308)
Supplement: 0913015107_pnas.0913015107_SI.pdf [file 0913015107_pnas.0913015107_SI.pdf]

# Supporting Information

Sokolov et al. 10.1073/pnas.0913015107

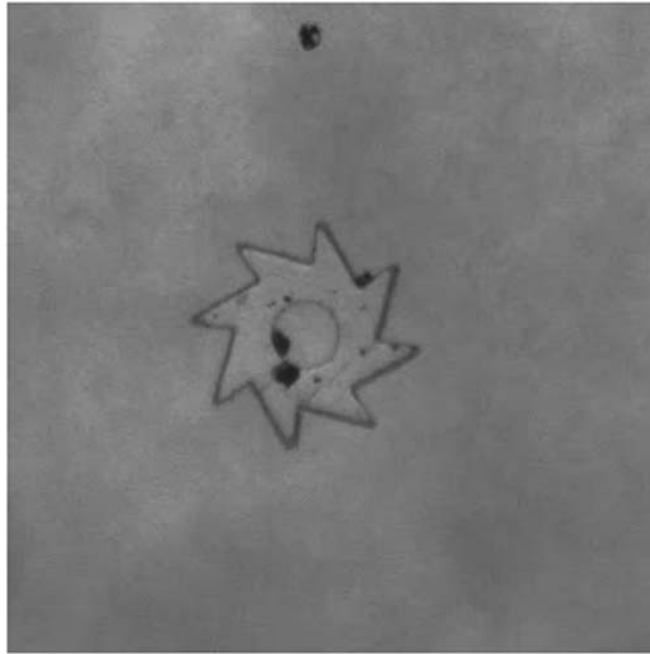

**Movie S1.** Rotation of a gear with eight external teeth, concentration of bacteria was  $2 \times 10^{10} \text{ cm}^{-3}$ , the film thickness was  $200 \mu\text{m}$ , and video frame rate 2 frames/sec (15 times faster than real time).

[Movie S1 \(MOV\)](#)

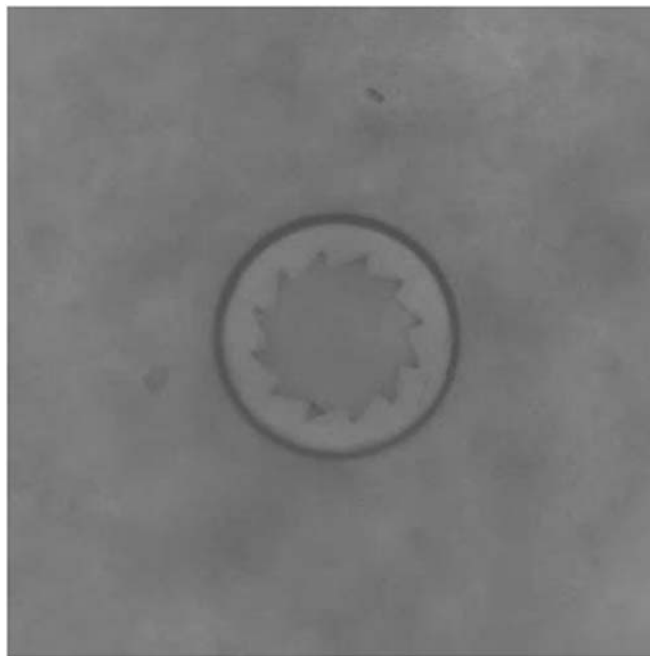

**Movie S2.** Rotation of a gear with 12 internal teeth, concentration of bacteria was  $2 \times 10^{10} \text{ cm}^{-3}$ , video frame rate 2 frames/sec (15 times faster than real time).

[Movie S2 \(MOV\)](#)

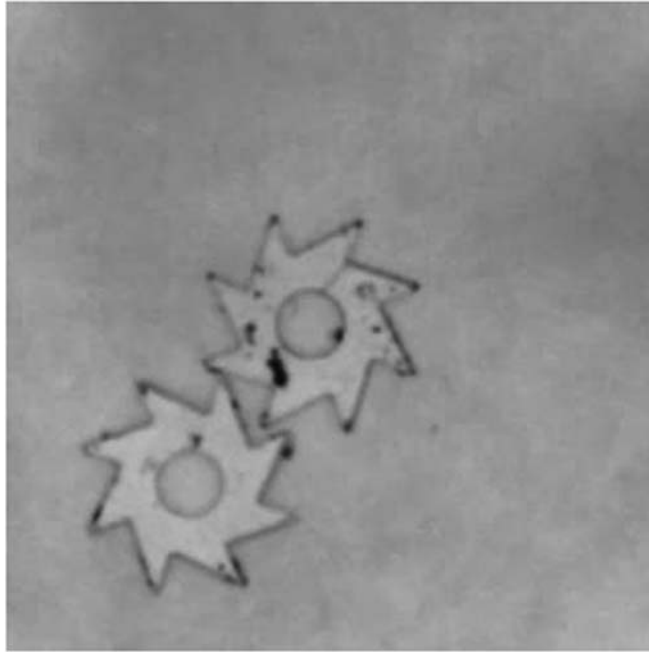

**Movie S3.** A system of two engaged gears rotating in opposite directions, concentration of bacteria was  $2 \times 10^{10} \text{ cm}^{-3}$ , and video frame rate 5 frames/sec (six times faster than real time).

[Movie S3 \(MOV\)](#)

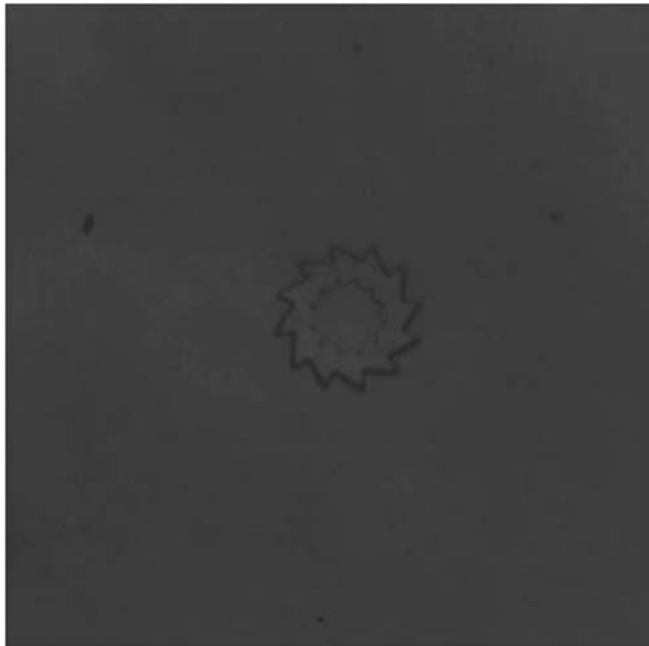

**Movie S4.** Speed control. The gear with external and internal teeth rotates when bacteria are exposed to air or oxygen but halt when the chamber is filled with nitrogen, concentration of bacteria was  $2 \times 10^{10} \text{ cm}^{-3}$ , and video frame rate 5 frames/sec (six times faster than real time).

[Movie S4 \(MOV\)](#)
